# Supplementary material
Source: Springer Nature journal article supplement (https://www.springermedizin.de/resource/supplementary/13032_2009_28_MOESM3_ESM.pdf/9651450)

**a)**

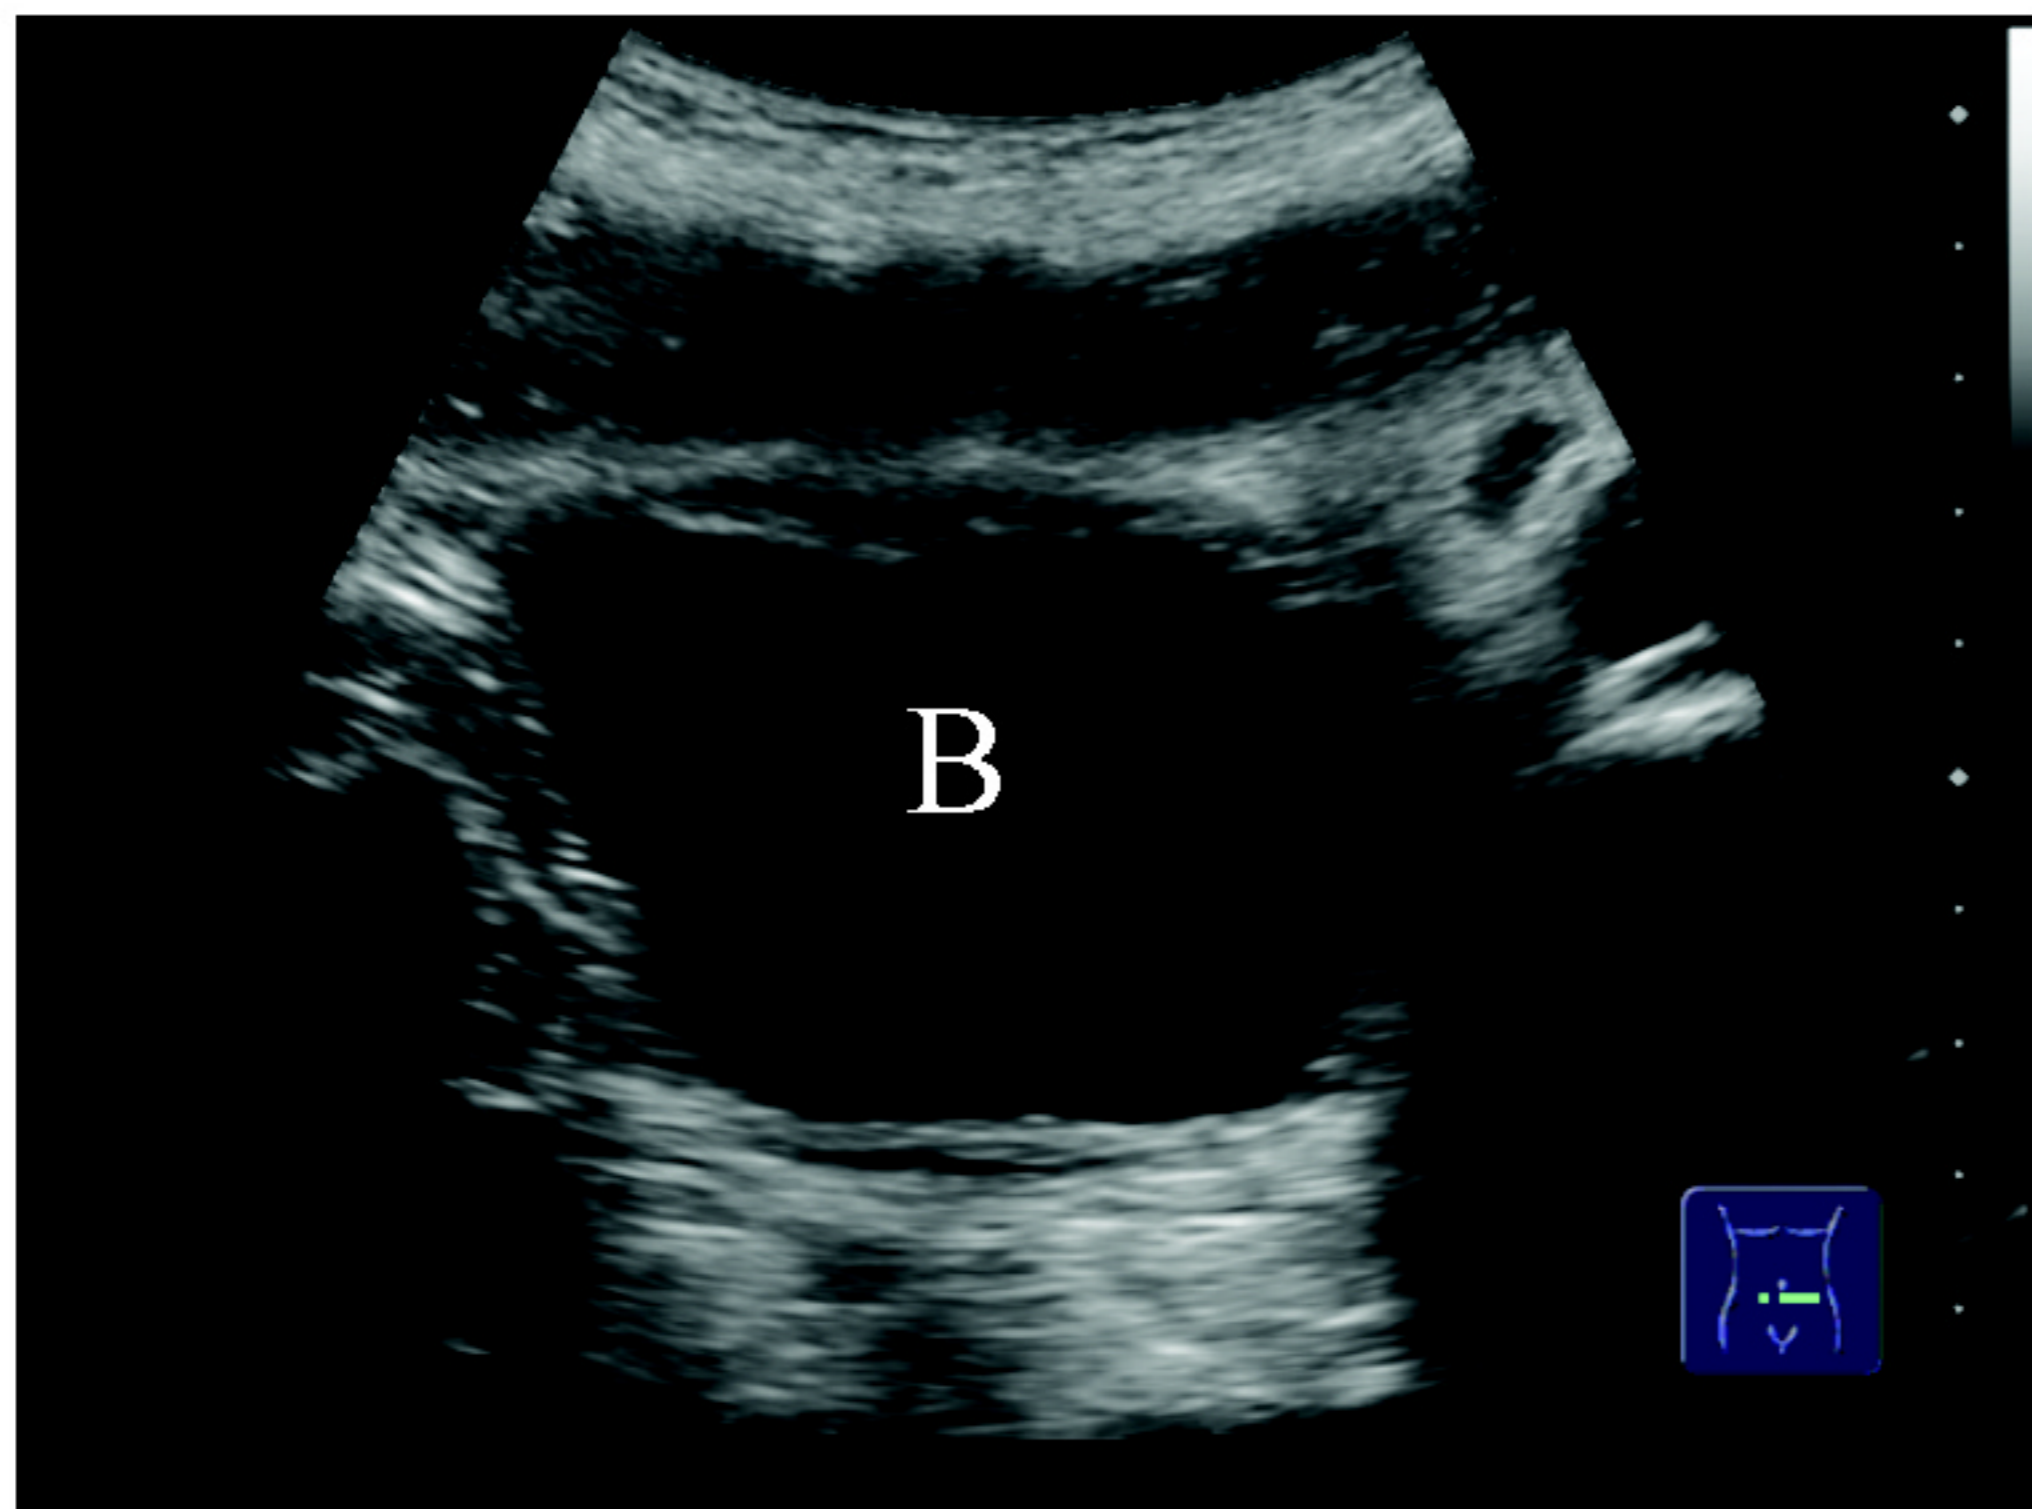

**b)**

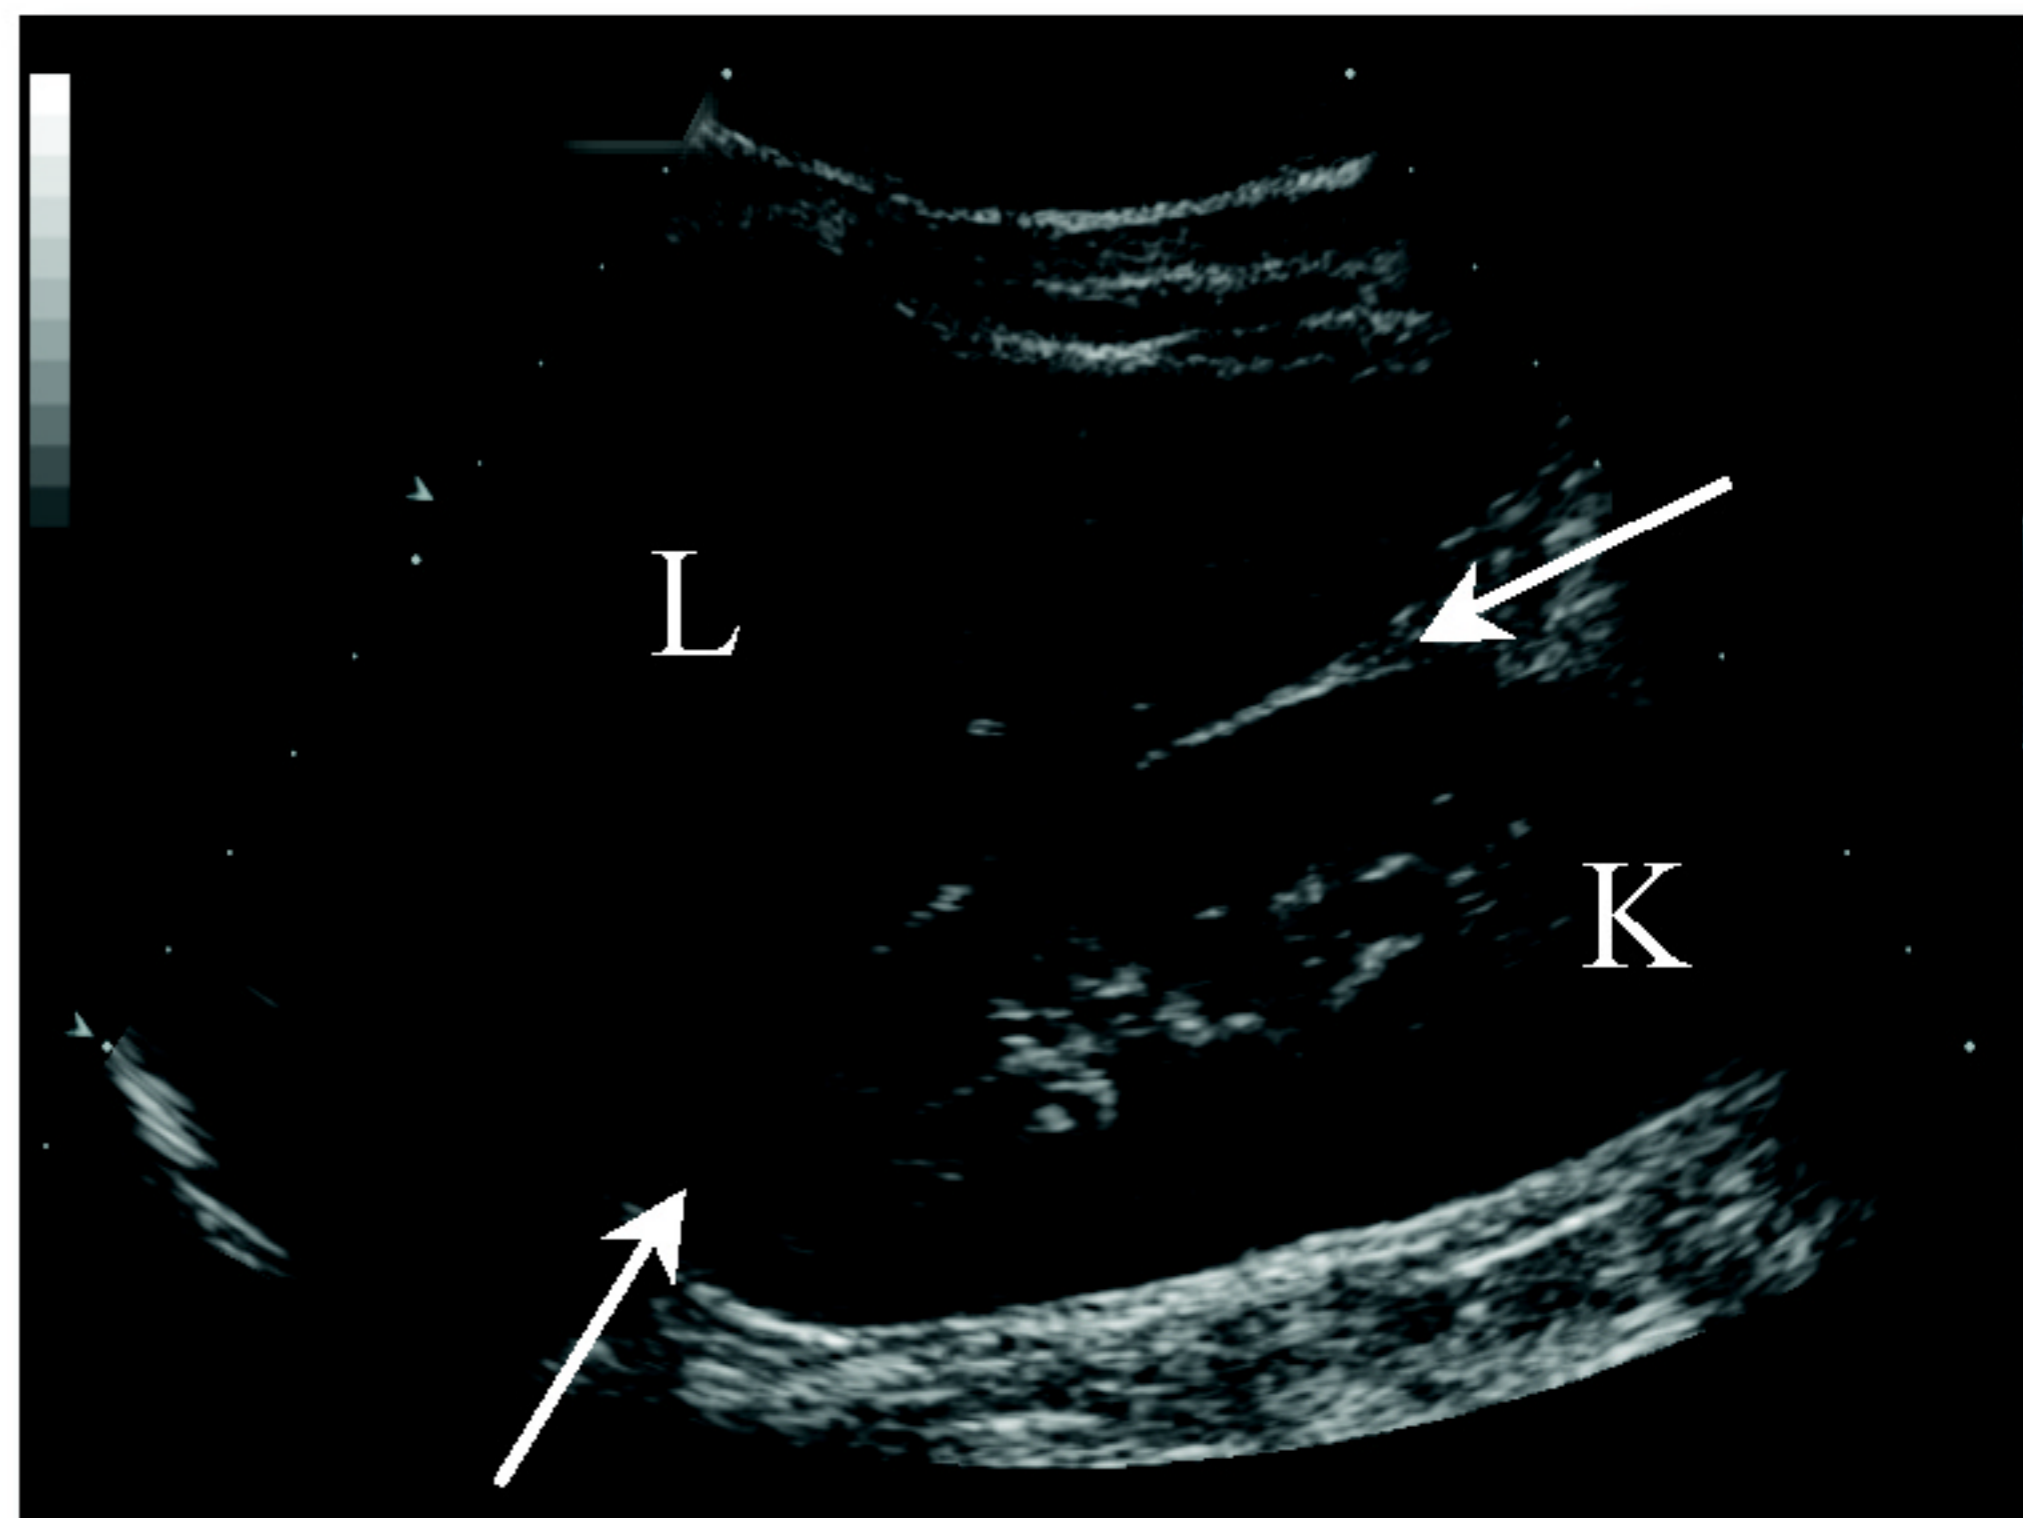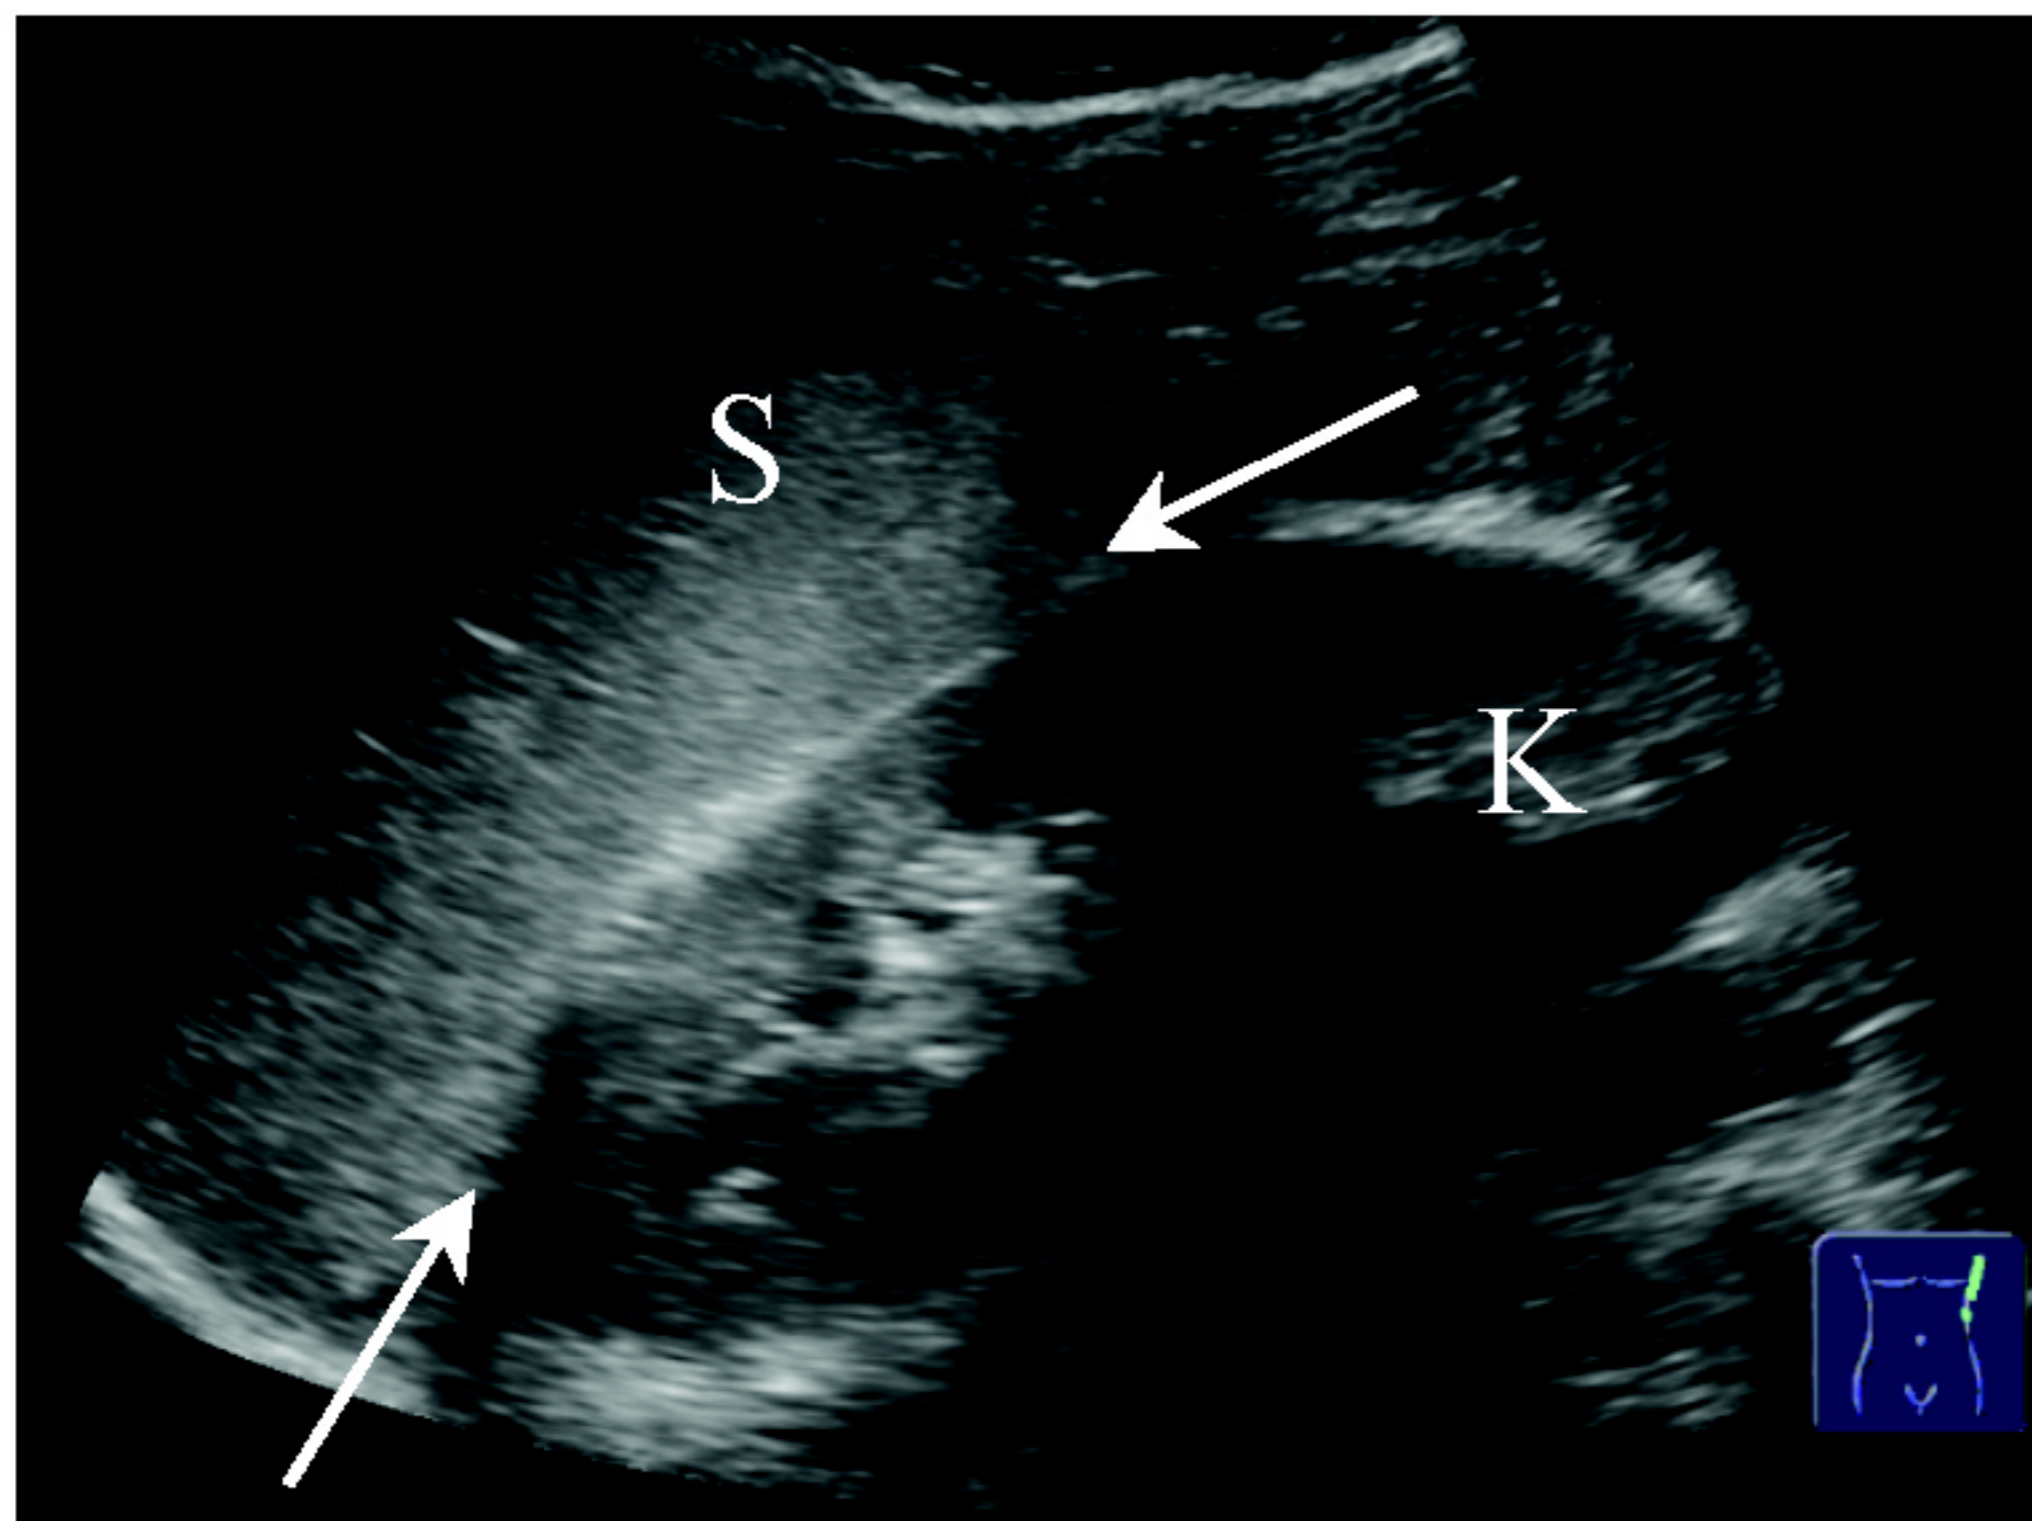

**c)**

Supplement: MOESM3 [file 9651450]
